# Supplementary material
Source: PubMed Central journal article supplement (PMC8054771)
Supplement: NIHMS1672348-supplement-2.pdf [file NIHMS1672348-supplement-2.pdf]

**A**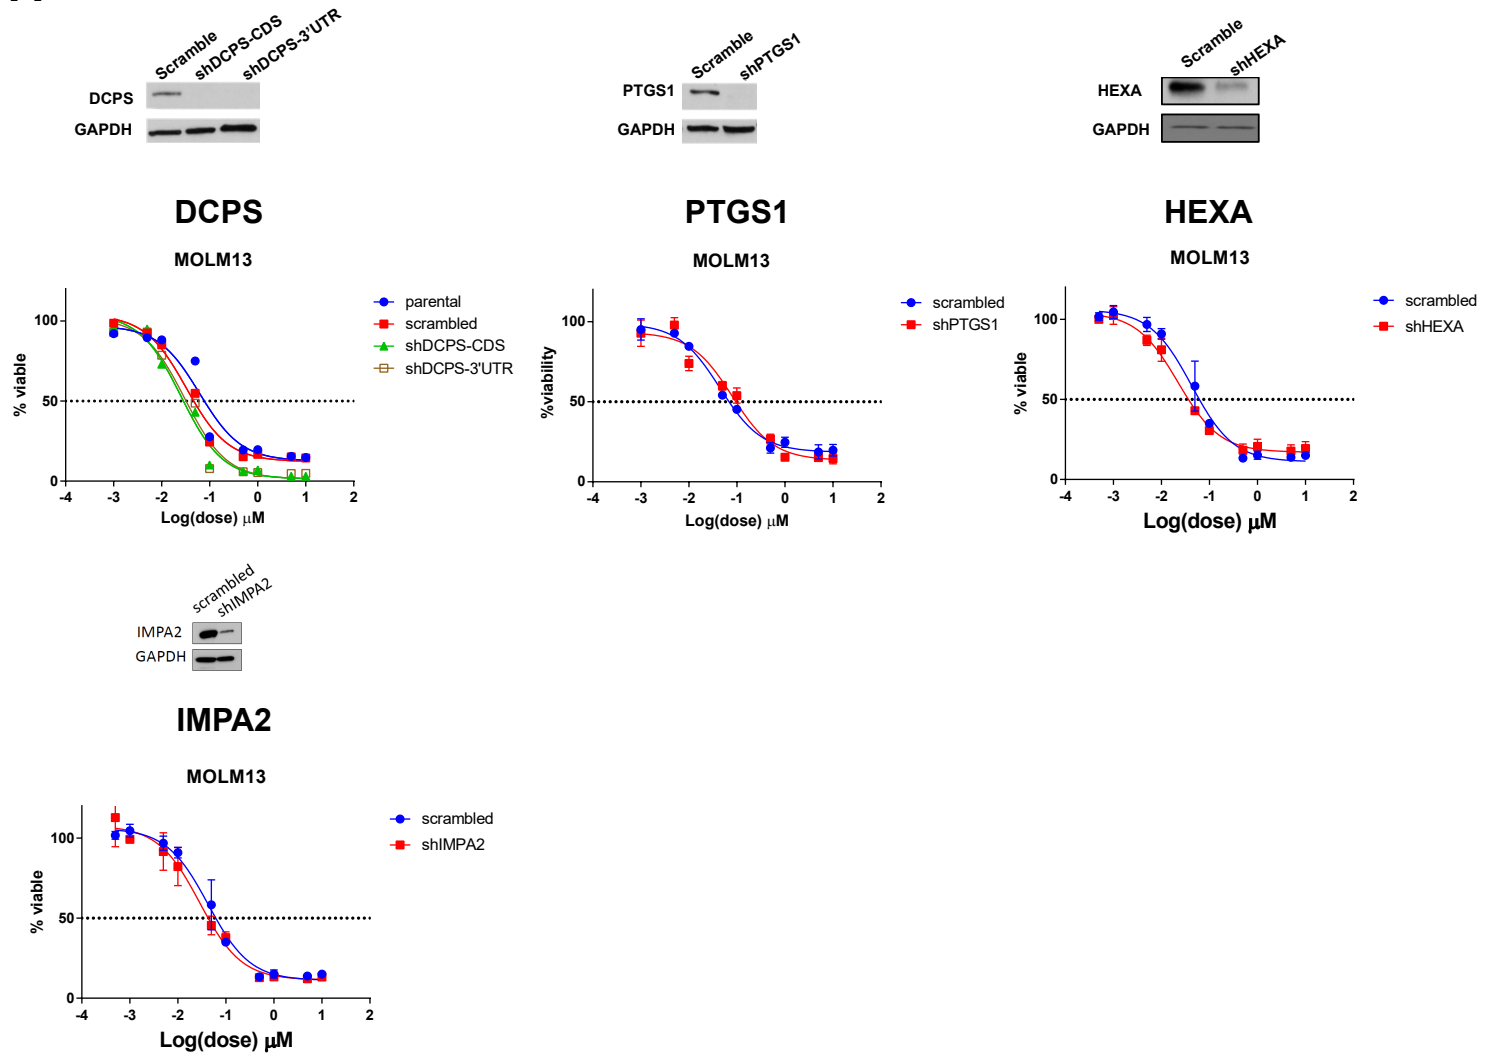**B**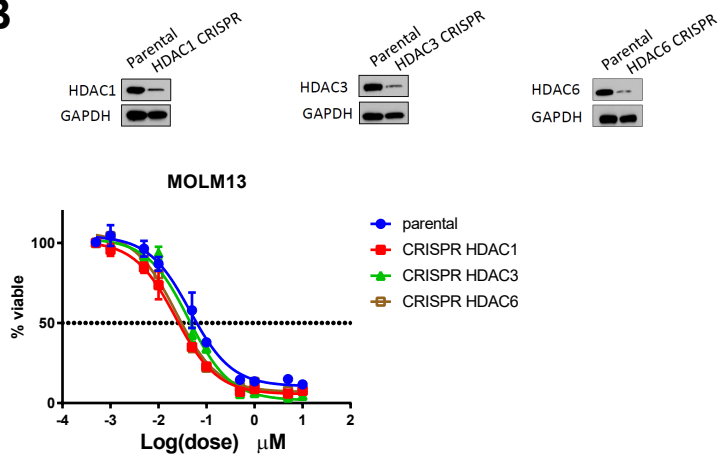

**Supplementary Figure S1. Knockdown of selected genes has modest effects on MOLM13 responses to KPT-9274 treatment.** A) Selected hits from CRISPR screen and B) various HDAC isoforms were knocked down by shRNA or CRISPR. The responses of parental, shRNA-stable and sgRNA-transfected MOLM13 cells to KPT-9274 treatment(48-hour treatments) are plotted. Cell viability was measured with MTS. Results are shown as mean $\pm$ SEM of 4 technical replicates and 3 biological replicates. Western blotting for knockdown efficiency is shown.
