# Supplementary material
Source: PubMed Central journal article supplement (PMC8054771)
Supplement: NIHMS1672348-supplement-4.pdf [file NIHMS1672348-supplement-4.pdf]

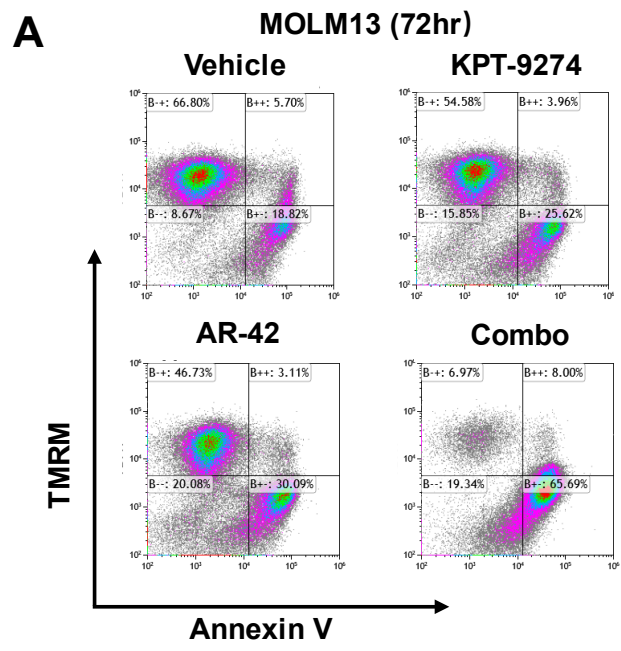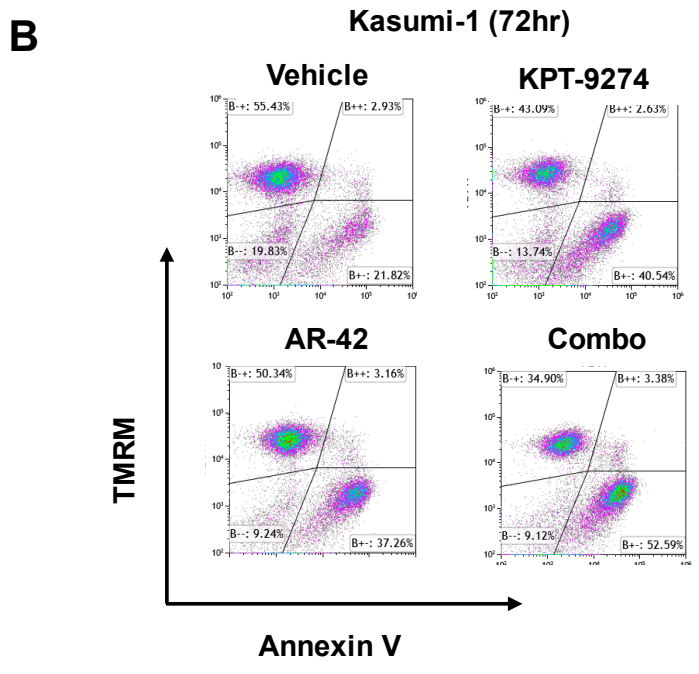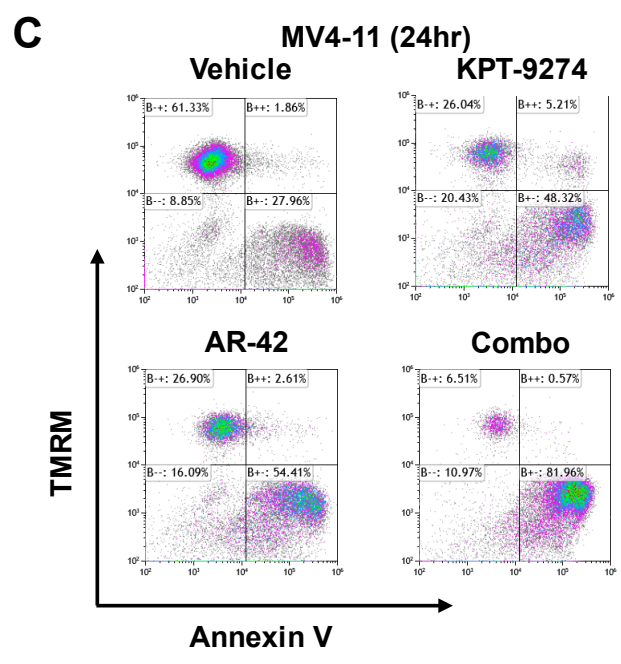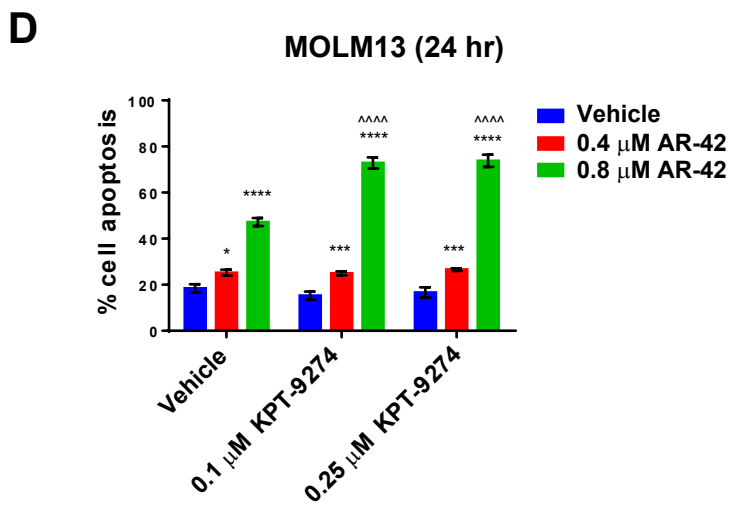

Supplementary Figure S3.

**Supplementary Figure S3. Combined treatment of AR-42 and KPT-9274 leads to mitochondrial potential collapses in cell lines.** A) MOLM13, B) Kasumi-1 and C) MV4-11 cells were treated with vehicle control, 0.8  $\mu$ M AR-42 alone, 0.1  $\mu$ M KPT-2974 alone or drug combo for indicated periods of time before being stained by TMRM in combination with Annexin V-FITC followed by flow cytometric analysis. n=2. D) MOLM-13 cells were treated with the indicated concentrations of AR-42 and/or KPT-9274. The survival of cells was analyzed by annexin V/PI labeling. \* $P < .05$ , \*\*\* $P < .001$ , \*\*\*\* $P < .0001$  vs vehicle control; \*\*\*\* $P < .0001$  vs AR-42 treatment alone.
