# Supplementary material
Source: PubMed Central journal article supplement (PMC8054771)
Supplement: NIHMS1672348-supplement-5.pdf [file NIHMS1672348-supplement-5.pdf]

**A** IDH2<sup>mut</sup> TF-1

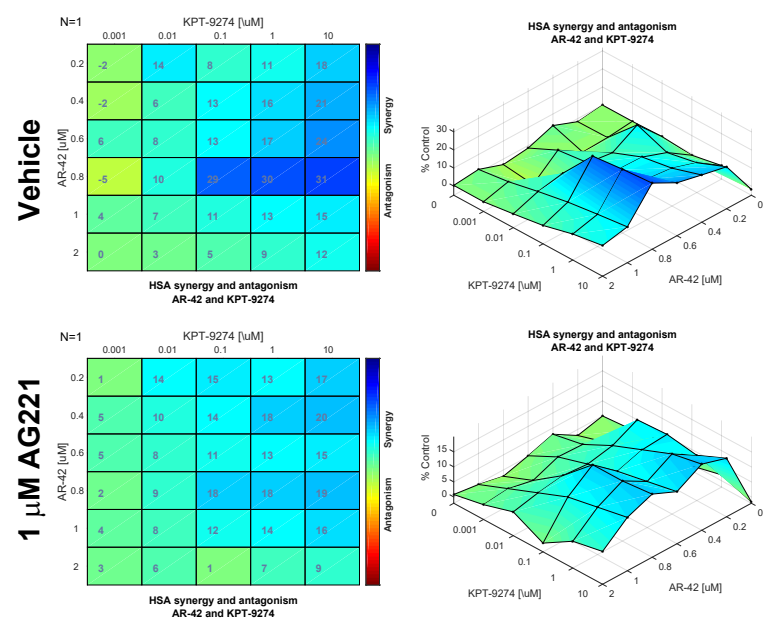

**B** IDH2<sup>WT</sup> TF-1

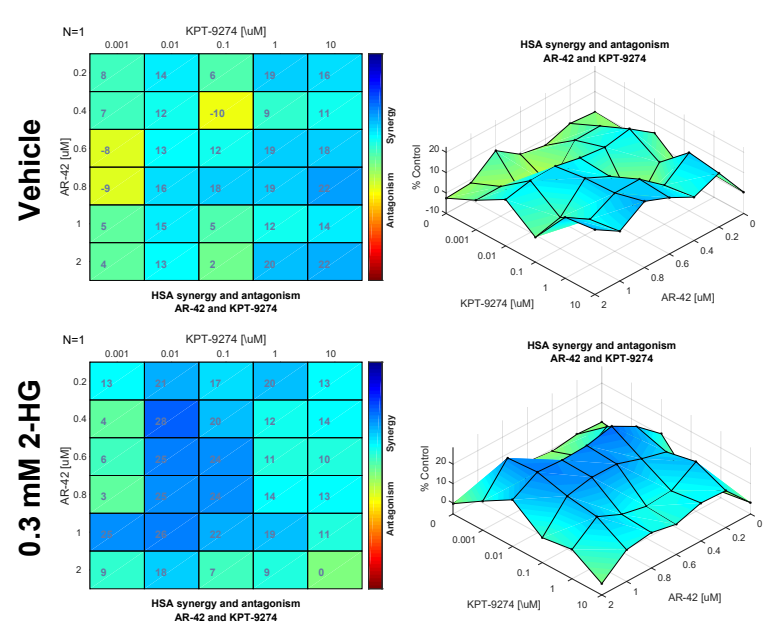

**C** IDH1<sup>mut</sup> patient#8

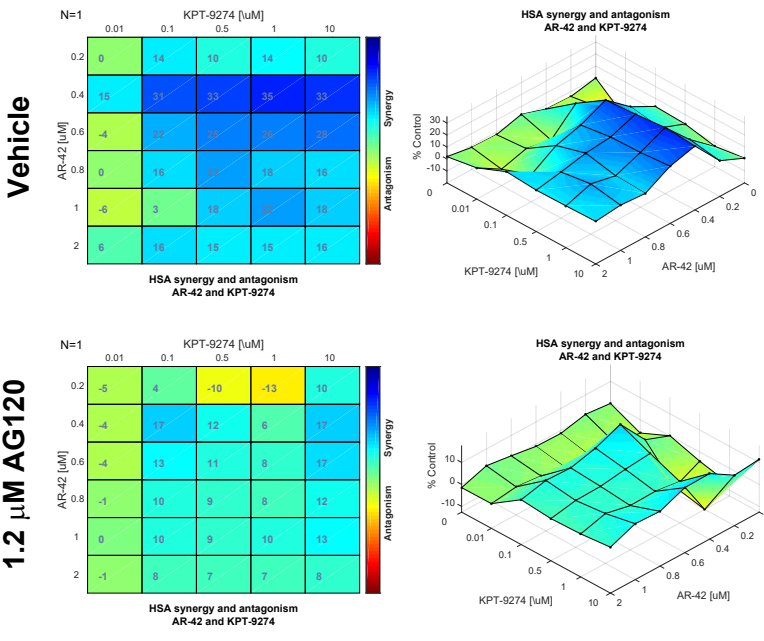

**D** IDH2<sup>mut</sup> patient#9

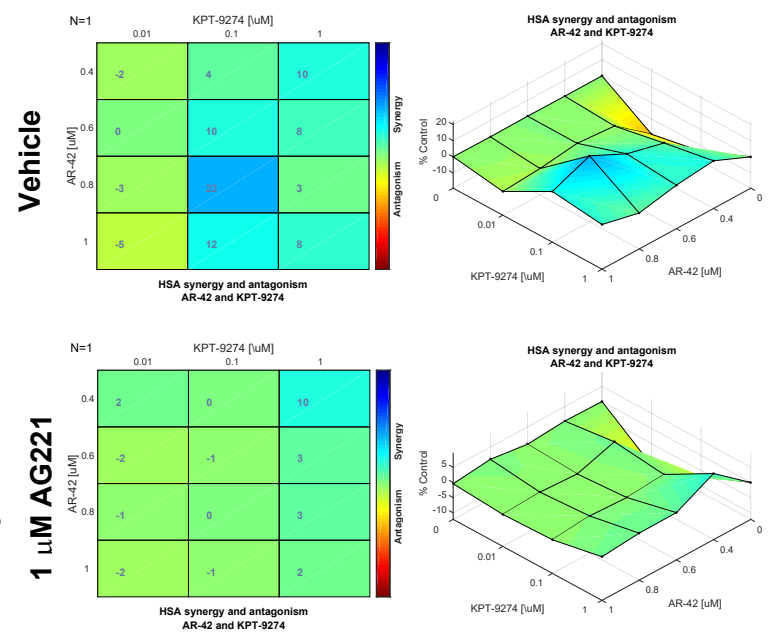

**Supplementary Figure S4. Mutant IDH1/2 enhances AR-42/KPT-9274 combination sensitivity in a 2-HG-dependent manner.** **A)** AG221 treatment prevents drug combination sensitivity on IDH2-mutant TF-1 cells. IDH2-mutant TF-1 cells were pre-treated with 1  $\mu$ M AG221 for 48 hours before being subject to pairwise drug combination treatment. **B)** 2-HG treatment enhances AR-42/KPT-9274 sensitivity. IDH2-WT TF-1 cells were exposed to 0.3 mM octyl-2HG (Sigma-Aldrich, St. Louis, MO) or DMSO control for 24 hours before being treated with drug combination. **C-D)** Inhibitions of mutant IDH1 and IDH2 reverse the vulnerability of IDH1-mutant and IDH2-mutant patient cells to drug combination. IDH1-mutant and IDH2-mutant patient cells were incubated with 1.2  $\mu$ M AG120 and 1  $\mu$ M AG221, respectively before AR-42/KPT-9274 treatments at indicated doses in the presence of cytokines. Cell viability was examined with MTS assays and synergy matrix and surface plots were generated with Combenefit.
