# Supplementary material
Source: PubMed Central journal article supplement (PMC8054771)
Supplement: NIHMS1672348-supplement-6.pdf [file NIHMS1672348-supplement-6.pdf]

**A**

| Comparison          | Estimated HR | 95% CI         | p-value |
|---------------------|--------------|----------------|---------|
| KPT -9274 vs. Combo | 4.53         | (1.59, 12.95)  | 0.005   |
| AR -42 vs. Combo    | 3.35         | (1.21, 9.3)    | 0.020   |
| Vehicle vs. Combo   | 33.74        | (8.69, 131.05) | <.001   |

|                        | Vehicle | KPT-9274 alone | AR-42 alone | KPT-9274/AR-42 combo |
|------------------------|---------|----------------|-------------|----------------------|
| Median survival (days) | 24      | 27             | 29          | 41                   |

**B**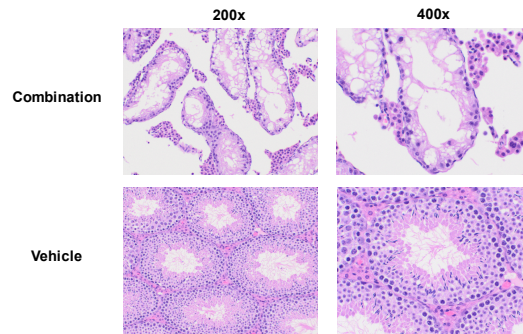**C**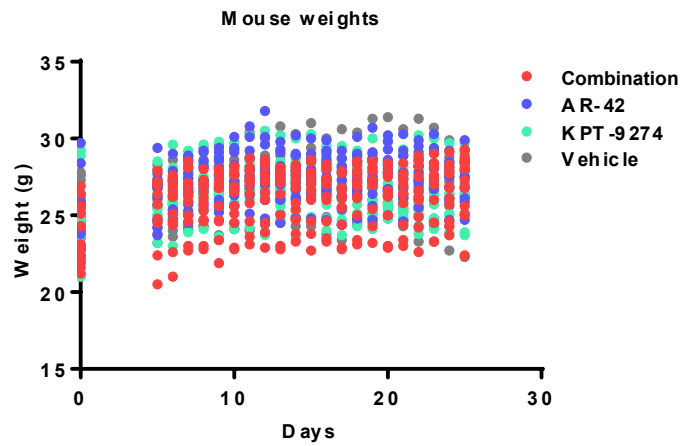

**Supplementary Figure S5. Combinations of AR-42 and KPT-9274 have no overlapping toxicities *in vivo*.** **A)** Statistical comparisons and median survival times of treatment groups. **B)** Mice in combination group displayed atrophy of seminiferous tubules and decreased to absent spermatogenesis. H&E images are representative of 3 different fields. **C)** Weight changes of MOLM13 xenograft mice in response to different treatments.
