# Supplementary material
Source: PubMed Central journal article supplement (PMC8054771)
Supplement: NIHMS1672348-supplement-7.pdf [file NIHMS1672348-supplement-7.pdf]

**A**

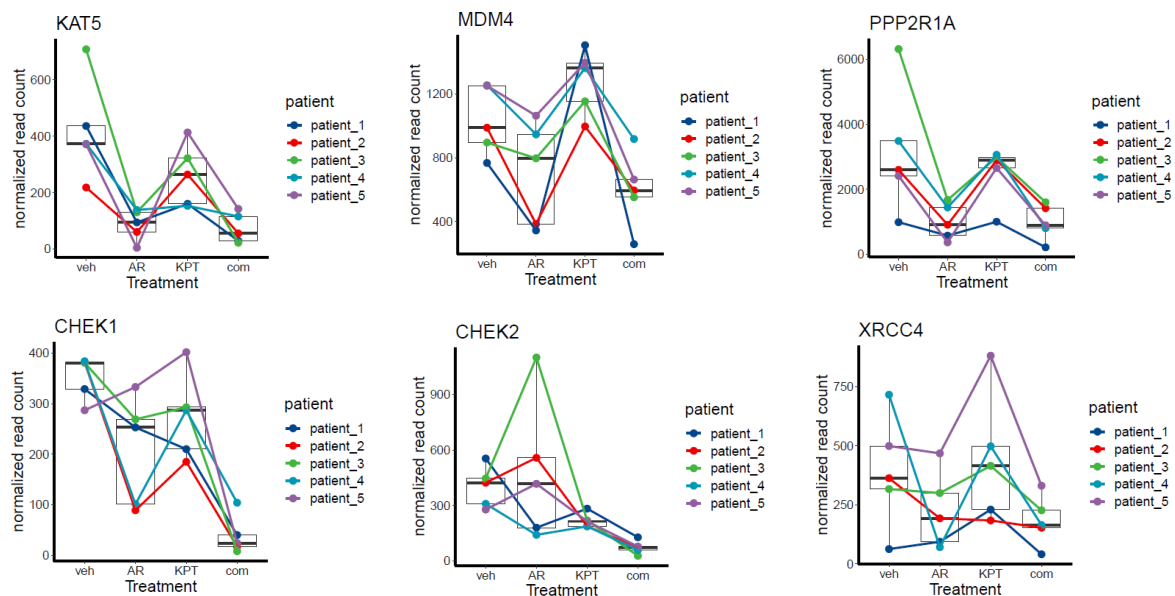

**B**

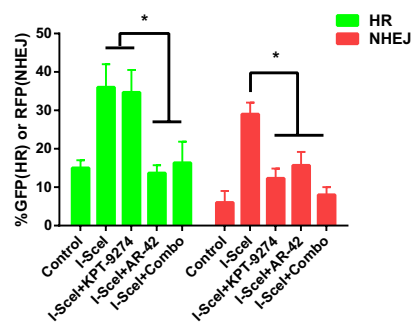

**C**

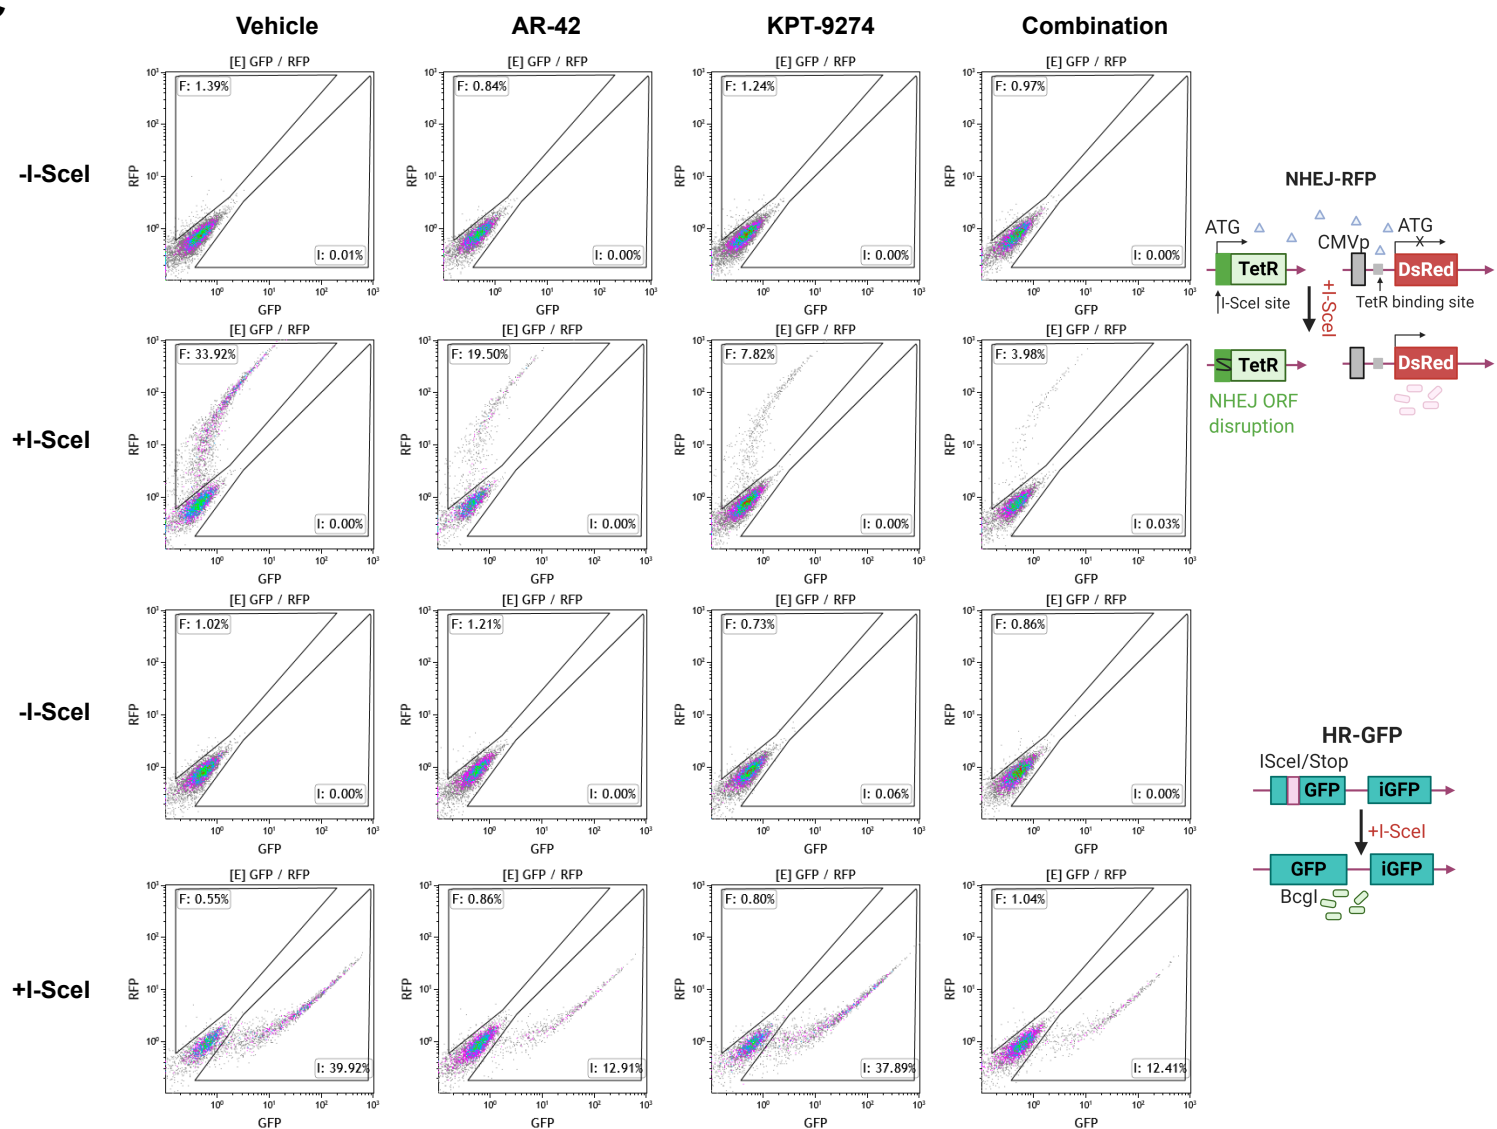

**Supplementary Figure S6.**

**Supplementary Figure S6. AR-42 and KPT-9274 treatments induce DNA repair defects.** **A)** Normalized read counts of selected DNA repair genes in LIC RNA-seq across patients under different treatment conditions. **B)** The effect of AR-42 and KPT-9274 exposures on U2OS-EJDR reporter system. Results are shown as mean  $\pm$  SEM of duplicates.  $*p<0.05$ . **C)** Representative flow cytometry plots showing the percentages of DsRed<sup>+</sup> and GFP<sup>+</sup> cells under different treatment conditions. The marked reduction in HR and NHEJ efficiencies after 24-hour exposure to inhibitors was revealed by ligand-inducible OCI-AML3-DR and OCI-AML3-EJ assays.
